# Supplementary material for: Controlled diazonium electrografting driven by overpotential reduction: a general strategy to prepare ultrathin layers
Source: Royal Society of Chemistry journal article supplement (doi:10.1039/c8cc08331b), 2018-12-06
Supplement: c8cc08331b1.pdf [file c8cc08331b1.pdf]

## SUPPLEMENTARY INFORMATION

### **Controlled Diazonium Electrografting Driven by Overpotential Reduction: A General Strategy to Prepare Ultrathin Layers**

Laure Pichereau, Isidoro Lopez, Marius Cesbron, Sylvie Dabos-Seignon, Christelle Gautier\* and Tony Breton\*

MOLTECH Anjou - UMR 6200 du CNRS, Université d'Angers, 2 Bd Lavoisier, Angers F-49045 Cedex, France

#### **Calculation of the nitrophenyl surface coverage**

Surface concentrations of nitrophenyl tethered surfaces were estimated from CVs recorded in KOH 0.1 M by summing the charges for the irreversible reduction of Ar-NO<sub>2</sub> and the charge for Ar-NHOH reoxidation and assuming a 6-electron transfer for each nitro group, as proposed by S. S. C. Yu *et al.* in *Langmuir* **2007**, 23, 11074-11082.

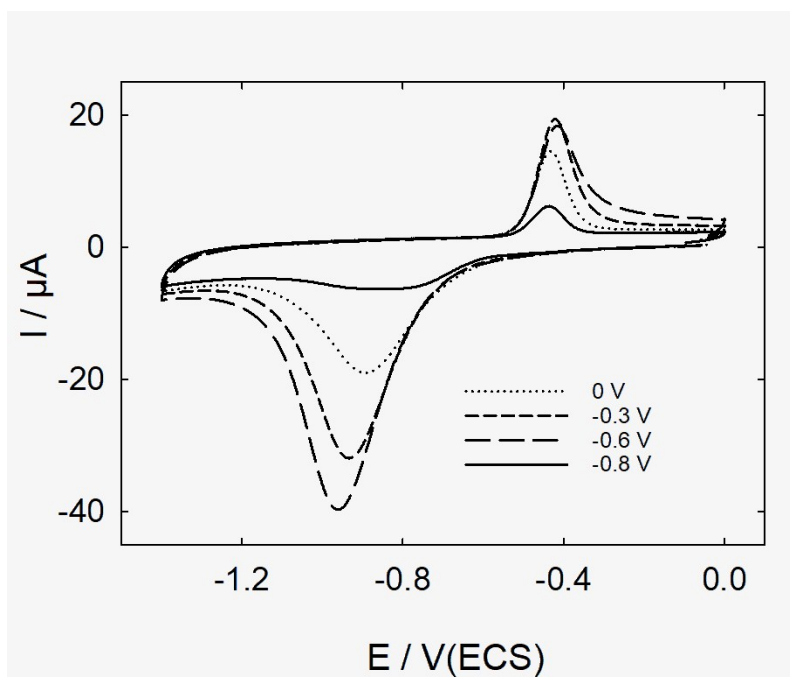

**Figure S1.** First CV recorded in aqueous deaerated 0.1M KOH on a modified glassy carbon electrode at 100 mV/s. Grafting was achieved at fixed potential for 2 min in the presence of 1 mM of 4-nitrobenzenediazonium in CH<sub>3</sub>CN 0.1 M nBu<sub>4</sub>NPF<sub>6</sub>.

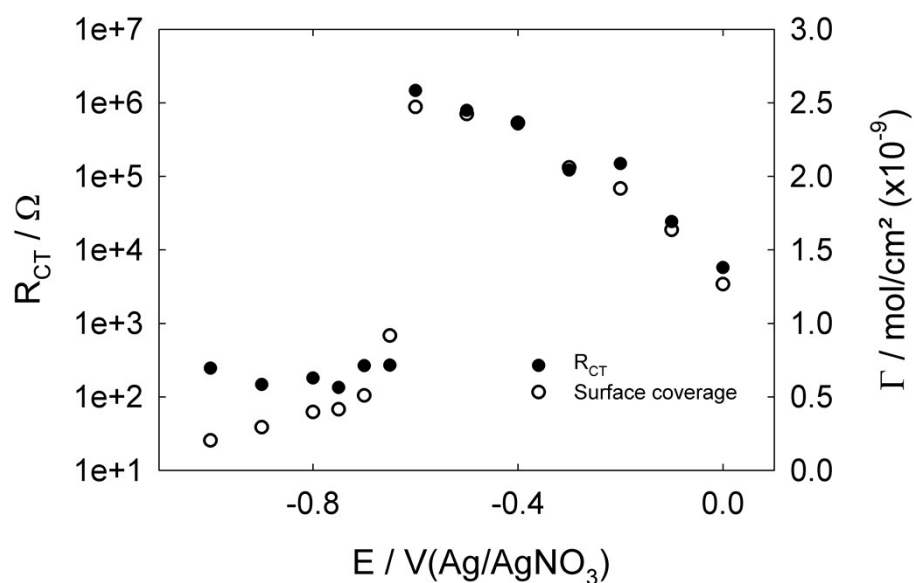

**Figure S2.** Charge transfer resistance measured on nitrophenyl modified glassy carbon electrode (●) in the presence of  $\text{Fe}(\text{CN})_6^{3-}/\text{Fe}(\text{CN})_6^{4-}$  and corresponding nitrophenyl surface coverage (○) as a function of the potential applied for the chronoamperometric electrografting under atmospheric conditions. Grafting was achieved at fixed potential for 2 min in the presence of 1 mM of 4-nitrobenzenediazonium.

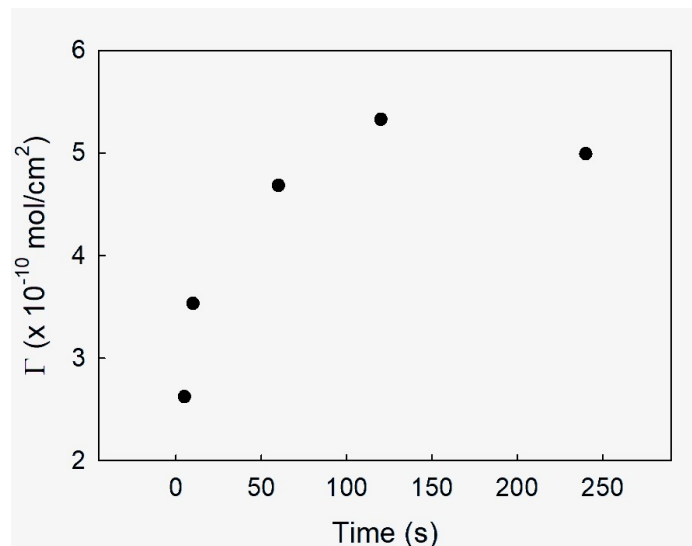

**Figure S3.** Calculated nitrophenyl surface coverage as a function of the grafting time at an applied potential of -0.8 V vs Ag/AgNO<sub>3</sub> under atmospheric conditions in the presence of 1 mM of 4-nitrobenzenediazonium.

**Table 1.** Atomic composition, determined by X-ray Photoelectron Spectroscopy, of modified surfaces at -0.6 V vs Ag/AgNO<sub>3</sub> under atmospheric and oxygen-free conditions.

|                        | C 1s | O 1s | N 1s (406 eV) |
|------------------------|------|------|---------------|
| Atmospheric conditions | 83.0 | 13.2 | 3.8           |
| Oxygen-free conditions | 83.2 | 12.5 | 4.3           |

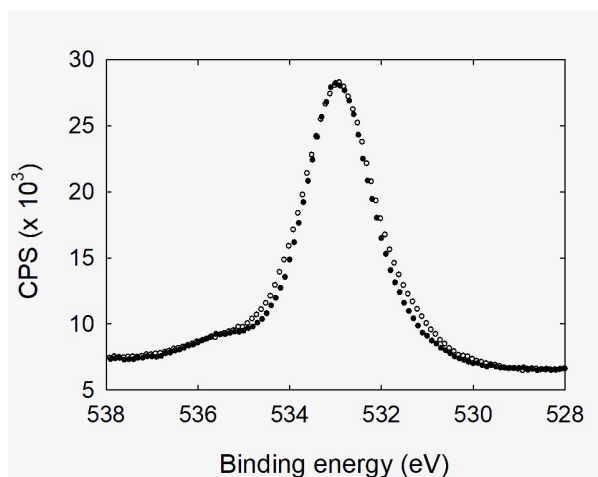

**Figure S4.** XPS O1s core level spectra of modified surfaces at -0.6 V vs Ag/AgNO<sub>3</sub> under atmospheric conditions (○) and under oxygen-free conditions (◊).

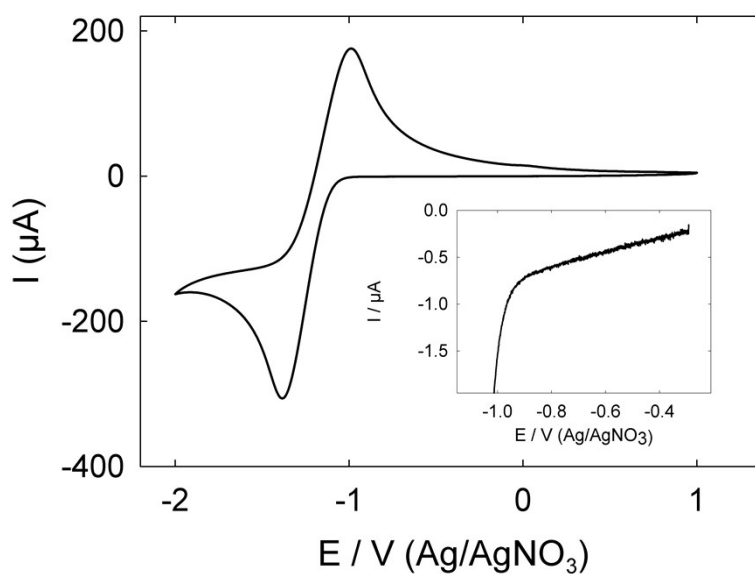

**Figure S5.** CV recorded at 50 mV/s in acetonitrile 0.1 M nBu<sub>4</sub>NPF<sub>6</sub> on a bare glassy carbon electrode under atmospheric conditions. Inset: zoom on the starting reduction signal.

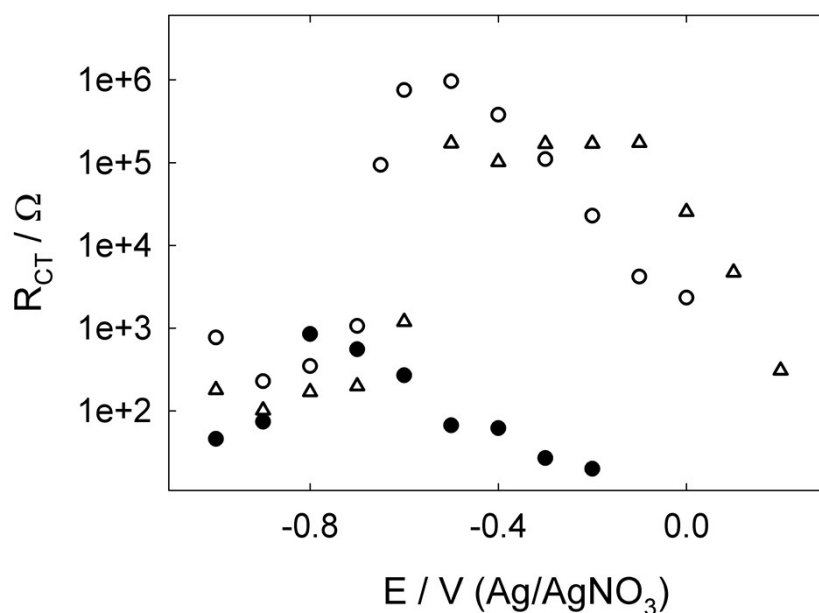

**Figure S6.** Charge transfer resistance measured on bromophenyl (○), 4-(2-aminoethyl)phenyl (●) and 1-anthraquinone (□) modified glassy carbon electrode in the presence of  $\text{Fe}(\text{CN})_6^{3-}/\text{Fe}(\text{CN})_6^{4-}$  as a function of the potential applied for the chronoamperometric electrografting under atmospheric conditions. Grafting was achieved at fixed potential for 2 min in the presence of 1 mM of the corresponding diazonium derivative.

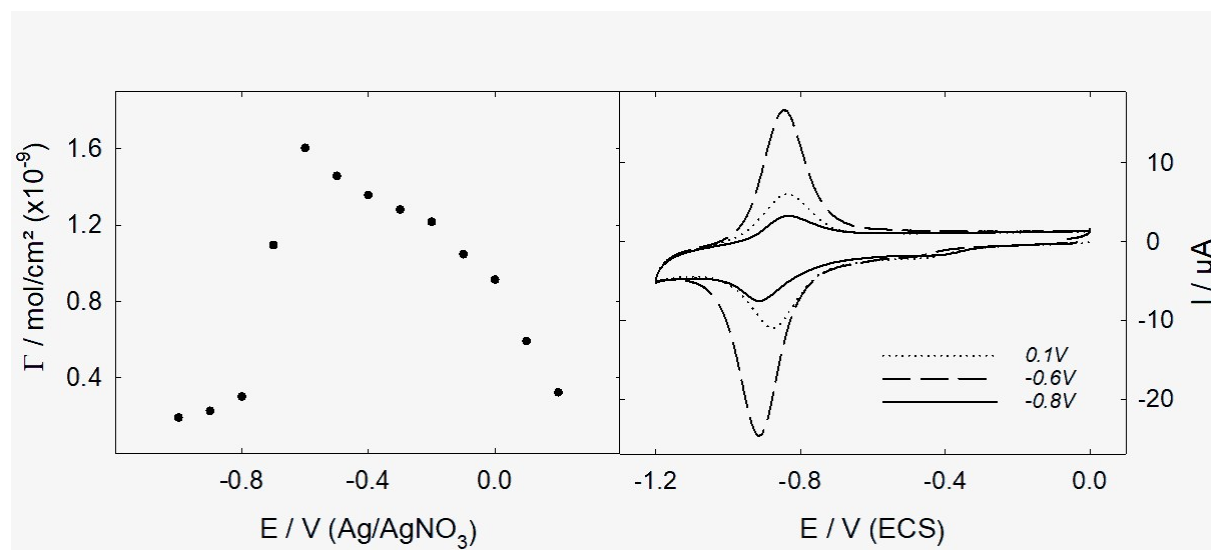

**Figure S7.** Left: anthraquinone surface coverage, determined from voltammetric data recorded in KOH 0.1 M, on a modified glassy carbon electrode as a function of the potential applied for the chronoamperometric electrografting under atmospheric conditions. Right: corresponding CVs for modification carried out at 0.1 V, -0.6 V and -0.8 V vs  $\text{Ag}/\text{AgNO}_3$ .
